# Supplementary material for: Lower mortality following pulmonary adverse events and sepsis with ticagrelor compared to clopidogrel in the PLATO study
Source: PubMed Central journal article supplement — Platelets. 2013 Oct 15;25(7):517–25. doi: 10.3109/09537104.2013.842965 (PMC4220996; doi:10.3109/09537104.2013.842965), 2013-10-15
Supplement: PLC-25-517-s1.pdf [file PLC-25-517-s1.pdf]

## Supplement

**Supplementary Table 1A. Event rates for pulmonary and sepsis AE according to individual terms**

| Event                     | MedDRA Preferred Term Name        | Ticagrelor<br>N=9235<br>no. of<br>events (%) | Clopidogrel<br>N=9186<br>no. of<br>events (%) |
|---------------------------|-----------------------------------|----------------------------------------------|-----------------------------------------------|
| Pulmonary AE              | Lower respiratory tract infection | 22 (0.2)                                     | 23 (0.3)                                      |
|                           | Lung infection                    | 13 (0.1)                                     | 11 (0.1)                                      |
|                           | Pleural disorders                 | 122 (1.3)                                    | 135 (1.5)                                     |
|                           | Pneumonia                         | 209 (2.3)                                    | 227 (2.5)                                     |
|                           | Respiratory failure               | 27 (0.3)                                     | 29 (0.3)                                      |
| Pulmonary AE on-treatment | Lower respiratory tract infection | 16 (0.2)                                     | 18 (0.2)                                      |
|                           | Lung infection                    | 10 (0.1)                                     | 11 (0.1)                                      |
|                           | Pleural disorders                 | 83 (0.9)                                     | 104 (1.1)                                     |
|                           | Pneumonia                         | 162 (1.8)                                    | 204 (2.2)                                     |
|                           | Respiratory failure               | 18 (0.2)                                     | 22 (0.2)                                      |
| Septic AE                 | Bacteraemia                       | 8 (0.1)                                      | 5 (0.1)                                       |
|                           | Sepsis                            | 37 (0.4)                                     | 41 (0.4)                                      |
|                           | Septic                            | 6 (0.1)                                      | 12 (0.1)                                      |
| Septic AE on-treatment    | Bacteraemia                       | 6 (0.1)                                      | 5 (0.1)                                       |
|                           | Sepsis                            | 29 (0.3)                                     | 30 (0.3)                                      |
|                           | Septic                            | 3 (0.0)                                      | 9 (0.1)                                       |

Pulmonary AE are grouped according to MedDRA high-level group name of 'PLEURAL DISORDERS' or MedDRA preferred term names containing 'PNEUMONIA', 'RESPIRATORY FAILURE', 'LOWER RESPIRATORY TRACT INFECTION' or 'LUNG INFECTION'. AE rates include individuals who had more than one type of event but individual rates do not count the same individual twice.

On-treatment: An event/adjudicated death with onset not later than 7 days after the last recorded dose of active study drug

Septic AE consist of MedDRA preferred term names containing 'SEPSIS', 'SEPTIC' or 'BACTERAEMIA'

**Supplementary Table 1B. Incidence of pulmonary and sepsis AEs and associated mortality according to treatment group in those who did not or did have CABG surgery during the study**

| Event                                              | CABG surgery during study? | Ticagrelor N=9235 no. of events (%) | Clopidogrel N=9186 no. of events (%) |
|----------------------------------------------------|----------------------------|-------------------------------------|--------------------------------------|
| Pulmonary AE                                       | No                         | 244 (2.6)                           | 267 (2.9)                            |
|                                                    | Yes                        | 125 (1.4)                           | 123 (1.3)                            |
| Death following pulmonary AE                       | No                         | 42 (0.5)                            | 74 (0.8)                             |
|                                                    | Yes                        | 5 (0.1)                             | 10 (0.1)                             |
| Pulmonary AE on-treatment                          | No                         | 193 (2.1)                           | 232 (2.5)                            |
|                                                    | Yes                        | 82 (0.9)                            | 99 (1.1)                             |
| Death after pulmonary AE with continuing treatment | No                         | 10 (0.1)                            | 39 (0.4)                             |
|                                                    | Yes                        | 0 (0.0)                             | 4 (0.0)                              |
| Death on-treatment following pulmonary AE          | No                         | 21 (0.2)                            | 36 (0.4)                             |
|                                                    | Yes                        | 0 (0.0)                             | 6 (0.1)                              |
| Sepsis AE                                          | No                         | 30 (0.3)                            | 42 (0.5)                             |
|                                                    | Yes                        | 20 (0.2)                            | 15 (0.2)                             |
| Sepsis AE on-treatment                             | No                         | 24 (0.3)                            | 34 (0.4)                             |
|                                                    | Yes                        | 14 (0.2)                            | 10 (0.1)                             |
|                                                    | Total                      | 38 (0.4)                            | 44 (0.5)                             |
| Death attributed to sepsis                         | No                         | 5 (0.1)                             | 12 (0.1)                             |
|                                                    | Yes                        | 2 (0.0)                             | 11 (0.1)                             |
| Pulmonary or sepsis AE                             | No                         | 266 (2.9)                           | 287 (3.1)                            |
|                                                    | Yes                        | 139 (1.5)                           | 133 (1.4)                            |
| Death following pulmonary or sepsis AE             | No                         | 51 (0.6)                            | 82 (0.9)                             |
|                                                    | Yes                        | 9 (0.1)                             | 15 (0.2)                             |
|                                                    |                            |                                     |                                      |
| Pulmonary or sepsis AE on-treatment                | No                         | 213 (2.3)                           | 251 (2.7)                            |
|                                                    | Yes                        | 94 (1.0)                            | 107 (1.2)                            |

| Event                                                                   | CABG surgery during study? | Ticagrelor N=9235 no. of events (%) | Clopidogrel N=9186 no. of events (%) |
|-------------------------------------------------------------------------|----------------------------|-------------------------------------|--------------------------------------|
| Death attributed to sepsis following pulmonary AE                       | No                         | 0 (0.0)                             | 7 (0.1)                              |
|                                                                         | Yes                        | 1 (0.0)                             | 4 (0.0)                              |
| Death attributed to sepsis after pulmonary AE with continuing treatment | No                         | 0 (0.0)                             | 5 (0.1)                              |
|                                                                         | Yes                        | 0 (0.0)                             | 2 (0.0)                              |
| Death attributed to sepsis following pulmonary AE on-treatment          | No                         | 0 (0.0)                             | 6 (0.1)                              |
|                                                                         | Yes                        | 1 (0.0)                             | 4 (0.0)                              |
| Sepsis AE following pulmonary AE on-treatment                           | No                         | 5 (0.1)                             | 15 (0.2)                             |
|                                                                         | Yes                        | 3 (0.0)                             | 4 (0.0)                              |
| Death on-treatment following pulmonary or septic AE                     | No                         | 28 (0.3)                            | 38 (0.4)                             |
|                                                                         | Yes                        | 0 (0.0)                             | 8 (0.1)                              |

**Supplementary Table 1C. Adjudication of deaths following pulmonary or sepsis AEs as ‘cardiovascular’ or ‘non-cardiovascular’**

| Event                                     | CV/non-CV death | Ticagrelor<br>N=9235<br>no. of<br>events (%) | Clopidogrel<br>N=9186<br>no. of<br>events (%) |
|-------------------------------------------|-----------------|----------------------------------------------|-----------------------------------------------|
| Death following pulmonary AE on-treatment | Non-CV death    | 13 (0.1)                                     | 19 (0.2)                                      |
|                                           | CV death        | 20 (0.2)                                     | 52 (0.6)                                      |
|                                           | Total           | 33 (0.4)                                     | 71 (0.8)                                      |
| Death attributed to sepsis                | Non-CV death    | 5 (0.1)                                      | 16 (0.2)                                      |
|                                           | CV death        | 2 (0.0)                                      | 7 (0.1)                                       |
|                                           | Total           | 7 (0.1)                                      | 23 (0.3)                                      |
| Death following pulmonary or sepsis AE    | Non-CV death    | 24 (0.3)                                     | 32 (0.3)                                      |
|                                           | CV death        | 36 (0.4)                                     | 65 (0.7)                                      |
|                                           | Total           | 60 (0.6)                                     | 97 (1.1)                                      |

**Supplementary Table 1D. Incidences of sepsis AEs that *did not* follow a pulmonary AE**

| Event                                      | MedDRA Preferred Term Name <sup>a</sup> | Ticagrelor<br>N=9235<br>no. of events (%) | Clopidogrel<br>N=9186<br>no. of events (%) |
|--------------------------------------------|-----------------------------------------|-------------------------------------------|--------------------------------------------|
| Sepsis AE that did not follow pulmonary AE | Bacteraemia                             | 5 (0.1)                                   | 5 (0.1)                                    |
|                                            | Sepsis                                  | 31 (0.3)                                  | 26 (0.3)                                   |
|                                            | Septic                                  | 5 (0.1)                                   | 7 (0.1)                                    |

**Supplementary Table 2. Effect of baseline factors on pulmonary AE on-treatment**

|                                            | OR (95% CI)      | P-value |
|--------------------------------------------|------------------|---------|
| Treatment group, Ticagrelor vs Clopidogrel | 0.83 (0.70-0.98) | 0.0262  |
| Age (yrs), per 1-yr increase               | 1.04 (1.03-1.05) | <.0001  |
| Gender, female vs male                     | 0.73 (0.60-0.88) | 0.0014  |
| Weight, per 1-kg increase                  | 1.00 (0.99-1.00) | 0.3867  |
| Asthma, no vs yes                          | 0.47 (0.33-0.67) | <.0001  |
| COPD, no vs yes                            | 0.60 (0.46-0.79) | 0.0002  |
| Diabetes mellitus, no vs yes               | 0.71 (0.60-0.85) | 0.0002  |
| Habitual smoker, no vs yes                 | 0.88 (0.72-1.07) | 0.1936  |
| Congestive heart failure, no vs yes        | 0.80 (0.60-1.08) | 0.1437  |
| Non-haemorrhagic stroke, no vs yes         | 0.64 (0.46-0.89) | 0.0079  |
| Chronic renal disease, no vs yes           | 0.59 (0.44-0.79) | 0.0004  |
| Peripheral arterial disease, no vs yes     | 0.86 (0.64-1.15) | 0.3085  |
| Clopidogrel pre-rand, no vs yes            | 0.83 (0.71-0.98) | 0.0300  |

P-values and odds ratios (OR) from multivariable logistic regression for modelling the probability of pulmonary AE on-treatment using treatment group and baseline factors (gender, age, weight, asthma, chronic obstructive pulmonary disease (COPD), diabetes, smoker, congestive heart failure (CHF), non-haemorrhagic stroke, chronic renal disease, peripheral arterial disease (PAD) and clopidogrel pre-randomization) as independent variables

The odds ratios (OR) for the baseline factor are calculated according to not present vs. present (binary factors) and per 1 unit increase (continuous factors)

**Supplementary Table 3. Effect of baseline factors on death following pulmonary AE on-treatment**

|                                            | OR (95% CI)      | P-value |
|--------------------------------------------|------------------|---------|
| Treatment group, Ticagrelor vs Clopidogrel | 0.47 (0.31-0.72) | 0.0004  |
| Age (yrs), per 1-yr increase               | 1.07 (1.04-1.09) | <.0001  |
| Gender, female vs male                     | 0.66 (0.43-1.03) | 0.0704  |
| Weight, per 1-kg increase                  | 0.96 (0.95-0.98) | <.0001  |
| Asthma, no vs yes                          | 0.82 (0.29-2.29) | 0.6986  |
| COPD, no vs yes                            | 0.46 (0.26-0.81) | 0.0070  |
| Diabetes mellitus, no vs yes               | 0.43 (0.29-0.64) | <.0001  |
| Habitual smoker, no vs yes                 | 0.72 (0.45-1.17) | 0.1878  |
| Congestive heart failure, no vs yes        | 0.88 (0.47-1.64) | 0.6811  |
| Non-haemorrhagic stroke, no vs yes         | 0.36 (0.20-0.64) | 0.0006  |
| Chronic renal disease, no vs yes           | 0.51 (0.28-0.93) | 0.0272  |
| Peripheral arterial disease, no vs yes     | 0.87 (0.46-1.64) | 0.6700  |
| Clopidogrel pre-rand, no vs yes            | 1.21 (0.80-1.83) | 0.3578  |

P-values and odds ratios from multivariable logistic regression for modelling the probability of death following pulmonary AE on-treatment using treatment group and baseline factors (gender, age, weight, asthma, COPD, diabetes, smoker, CHF, non-haemorrhagic stroke, chronic renal disease, PAD and clopidogrel pre-randomization) as independent variables

The odds ratios (OR) for the baseline factors are calculated according to not present vs. present (binary factors) and per 1 unit increase (continuous factors)

**Supplementary Table 4. Incidence of leukopaenia and neutropaenia during the study according to treatment group**

| <b>Time point</b>                                       | <b>Ticagrelor<br/>90mg bd</b> | <b>Clopidogrel<br/>75mg od</b> |
|---------------------------------------------------------|-------------------------------|--------------------------------|
| <b>Total leukocyte counts</b>                           |                               |                                |
| <i>Randomisation</i>                                    | <i>n = 8168</i>               | <i>n = 8114</i>                |
| Total leukocyte count < 3.0 x 10 <sup>9</sup> /L, n (%) | 10 (0.1)                      | 12 (0.1)                       |
| <i>1 month</i>                                          | <i>n = 3792</i>               | <i>n = 3807</i>                |
| Total leukocyte count < 3.0 x 10 <sup>9</sup> /L, n (%) | 3 (0.08)                      | 3 (0.08)                       |
| <i>3 months</i>                                         | <i>n = 3357</i>               | <i>n = 3387</i>                |
| Total leukocyte count < 3.0 x 10 <sup>9</sup> /L, n (%) | 3 (0.09)                      | 1 (0.03)                       |
| <i>6 months</i>                                         | <i>n = 2736</i>               | <i>n = 2685</i>                |
| Total leukocyte count < 3.0 x 10 <sup>9</sup> /L, n (%) | 0                             | 6 (0.22)                       |
| <b>Differential neutrophil counts</b>                   |                               |                                |
| <i>Randomisation</i>                                    | <i>n = 7808</i>               | <i>n = 7785</i>                |
| Neutrophil count < 1.5 x 10 <sup>9</sup> /L, n (%)      | 6 (0.08)                      | 8 (0.1)                        |
| <i>1 month</i>                                          | <i>n = 3576</i>               | <i>n = 3600</i>                |
| Neutrophil count < 1.5 x 10 <sup>9</sup> /L, n (%)      | 2 (0.06)                      | 7 (0.19)                       |
| <i>3 months</i>                                         | <i>n = 3164</i>               | <i>n = 3202</i>                |
| Neutrophil count < 1.5 x 10 <sup>9</sup> /L, n (%)      | 6 (0.19)                      | 3 (0.09)                       |
| <i>6 months</i>                                         | <i>n = 2565</i>               | <i>n = 2539</i>                |
| Neutrophil count < 1.5 x 10 <sup>9</sup> /L, n (%)      | 2 (0.08)                      | 7 (0.28)                       |
